# Supplementary material
Source: PubMed Central journal article supplement (PMC6757159)
Supplement: jin-0010-0056-s01.pdf [file jin-0010-0056-s01.pdf]

**Supplemental Table 1. Effects of reduction in E3 ubiquitin ligases on signaling by the IL-36R.**

| <b>siRNA</b> | <b>IL-6 (fold)</b> | <b>siRNA</b> | <b>IL-6 (fold)</b> |
|--------------|--------------------|--------------|--------------------|
| Mock         | 5.54 ± 0.26*       | PHF6         | 4.04 ± 0.07        |
| Nonspecific  | 5.79 ± 0.06        | PHF5A        | 8.20 ± 0.23        |
| ANKIB1       | 6.28 ± 0.23        | PHF7         | 6.05 ± 0.48        |
| BAHD1        | 3.89 ± 0.32        | PHF20        | 2.57 ± 0.07        |
| BIRC3        | 3.97 ± 0.21        | PHF20L1      | 3.19 ± 0.21        |
| BMI1         | 4.98 ± 0.09        | PHF21A       | 3.11 ± 0.22        |
| CBL          | 6.12 ± 0.24        | RBCK1        | 4.82 ± 0.09        |
| CHD5         | 3.09 ± 0.02        | RFWD2        | 2.53 ± 0.04        |
| HRC          | 4.49 ± 0.04        | RLIM         | 3.91 ± 0.10        |
| INTS12       | 5.45 ± 0.17        | RNF5         | 1.78 ± 0.07        |
| JHDM1D       | 3.69 ± 0.20        | RNF7         | 5.33 ± 0.17        |
| KDM5B        | 6.29 ± 0.44        | RNF32        | 15.34 ± 0.33       |
| LOC644006    | 6.44 ± 0.39        | RNF39        | 3.83 ± 0.10        |
| MDM2         | 2.09 ± 0.04        | RNF114       | 5.44 ± 0.28        |
| MARCH4       | 3.46 ± 0.17        | RNF122       | 2.98 ± 0.19        |
| MARCH8       | 7.41 ± 0.19        | RNF123       | 12.64 ± 0.14       |
| MEX3A        | 8.85 ± 0.14        | RNF125       | 1.24 ± 0.08        |
| MEX3D        | 7.28 ± 0.37        | RNF133       | 1.84 ± 0.09        |
| MGRN1        | 5.36 ± 0.20        | RNF135       | 8.64 ± 0.59        |
| MID2         | 6.42 ± 0.33        | RNF152       | 2.11 ± 0.20        |
| MLLT6        | 8.42 ± 0.82        | RNF180       | 1.57 ± 0.03        |
| MIB2         | 5.06 ± 0.10        | RNF185       | 5.26 ± 0.52        |
| MYCBP2       | 3.74 ± 0.32        | TRAF6        | 1.03 ± 0.31        |
| PCGF1        | 7.07 ± 0.49        | TRIM39       | 6.07 ± 0.12        |
| PDZRN3       | 5.00 ± 0.39        | TRIM60       | 6.27 ± 0.56        |
| PRPF19       | 5.65 ± 0.38        | ZFAND6       | 2.07 ± 0.05        |

\*Fold change was calculated by dividing the IL-6 concentration of IL-6 produced in cells induced with IL-36 $\gamma$  from mock-treated cells. Each result represents mean and one standard error from three independent assays.

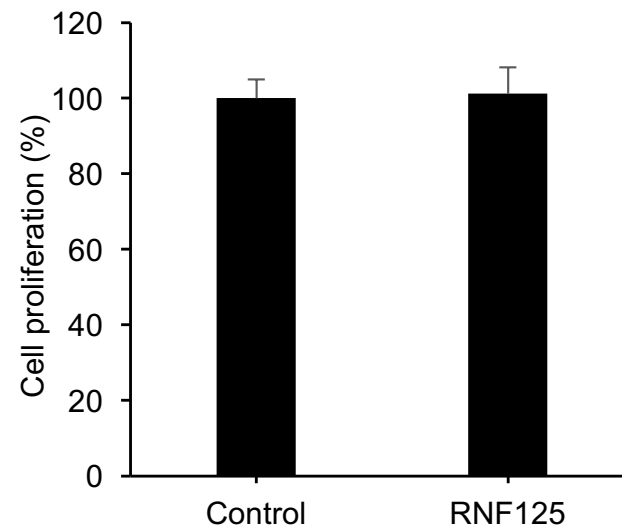

**Supplementary Fig. 1.** WST-1 assay was performed to measure the cell proliferation following siRNA transfection in NCI cells. WST-1 reagent (1:10 dilution) was added to the cells after 48 h of siRNA transfection and incubated for additional 4 h before the absorbance was measured.

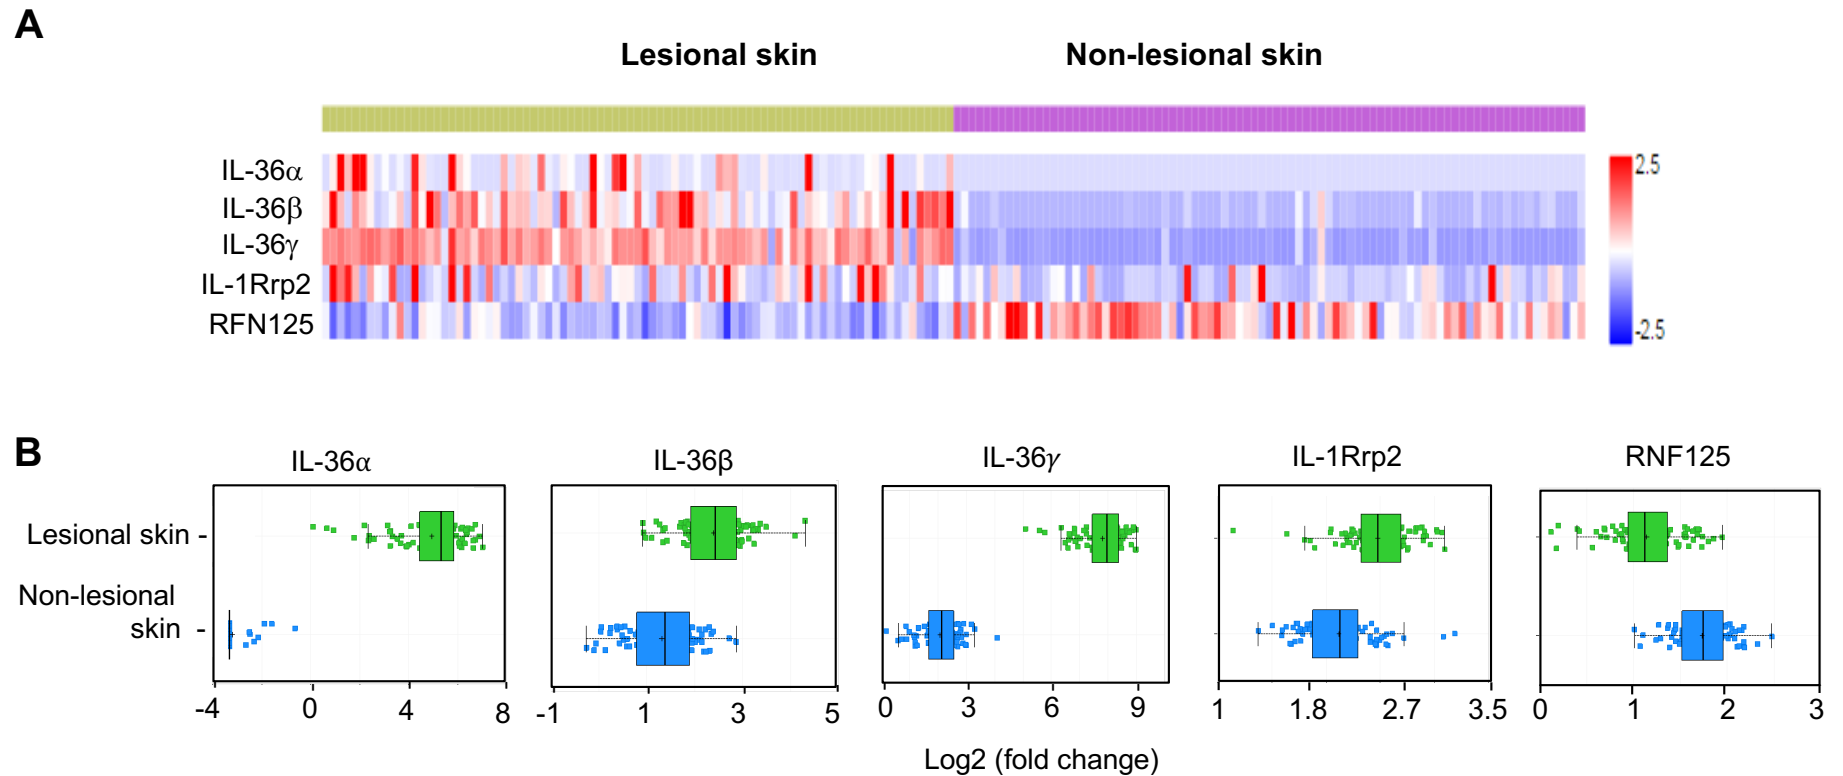

**Supplementary Fig. 2.** Ubiquitin ligase RNF125 expression is reduced in disease tissue with elevated expression of IL-36R and its agonist cytokines. **A)** Expression levels of the RNF125 are decreased in disease tissues that overexpress the IL-36R or cytokines that can induce IL-36R signaling. The data was from Boehringer Ingelheim collection of patient samples. **B)** RNA sequencing also reveals that RNF125 is inversely related to the expression of IL-1Rrp2 and the IL-36 cytokines in non-lesional and lesional skin. All differences have p values of < 0.01.

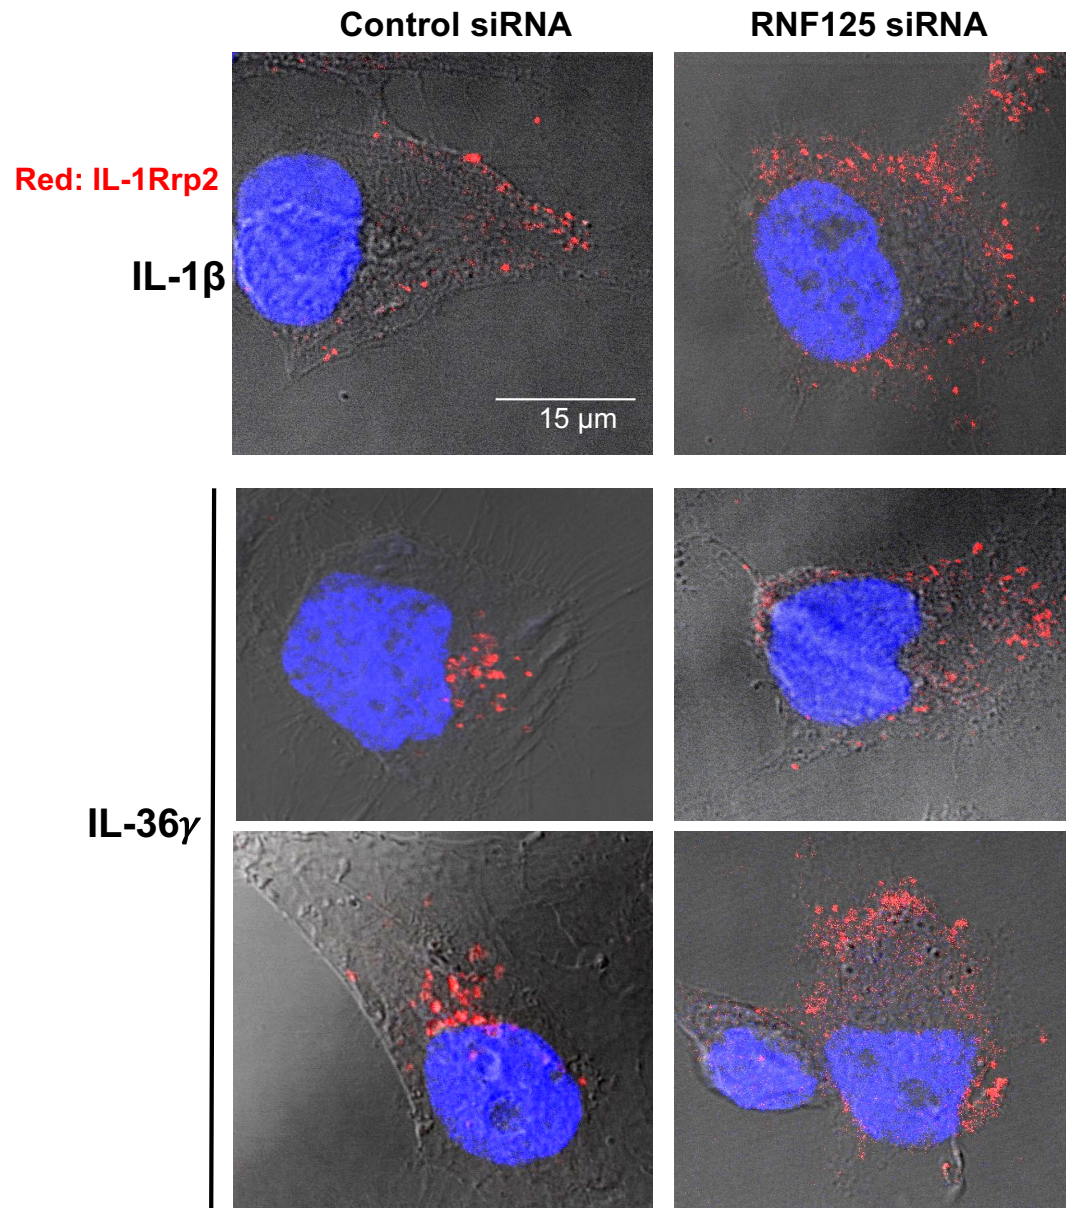

**Supplemental Fig. 3.** Knockdown of RNF125 inhibits the intracellular translocation of agonist-activated IL-1Rrp2. The epinuclear locations of the IL-36R have been previously demonstrated to be LAMP1+ lysosomes. Knockdown of RNF125 used a mixture of 4 siRNAs and reduced the level of RNF125 protein to 30%. DNA has been stained with DAPI. IL-1Rrp2 was stained with a specific antibody and a secondary antibody labeled with Alexa Fluor 594.

**A**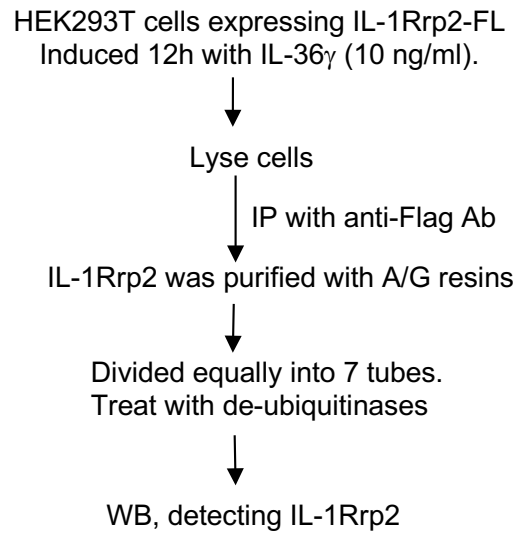**B**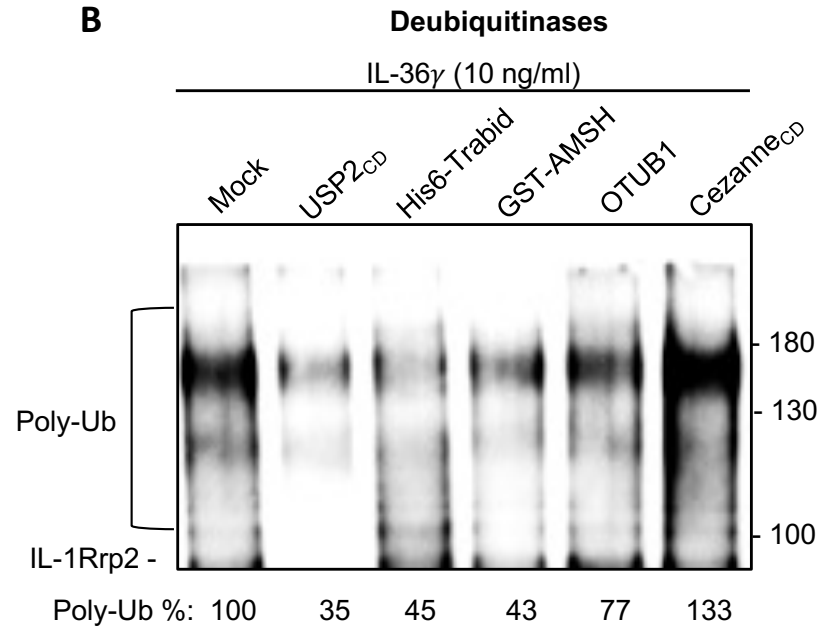

**Supplementary Fig. 4.** HEK293T cells expressing IL-36R contains a variety of ubiquitinations. **A)** Schematic of the protocol used to examine the types of ubiquitination on recombinant IL-1Rrp2 proteins. **B)** Western blot of the effects of de-ubiquitinases on polyubiquitinated IL-1Rrp2.
